# Supplementary figures and images for: Adenomyosis: single-cell transcriptomic analysis reveals a paracrine mesenchymal–epithelial interaction involving the WNT/ SFRP pathway
Source: PubMed Central journal article supplement — Fertil Steril. Author manuscript; Available in PMC 2024 Jul 18. (PMC11257082; doi:10.1016/j.fertnstert.2023.01.041), 2023-02-01

Supplementary fig. 1

a)

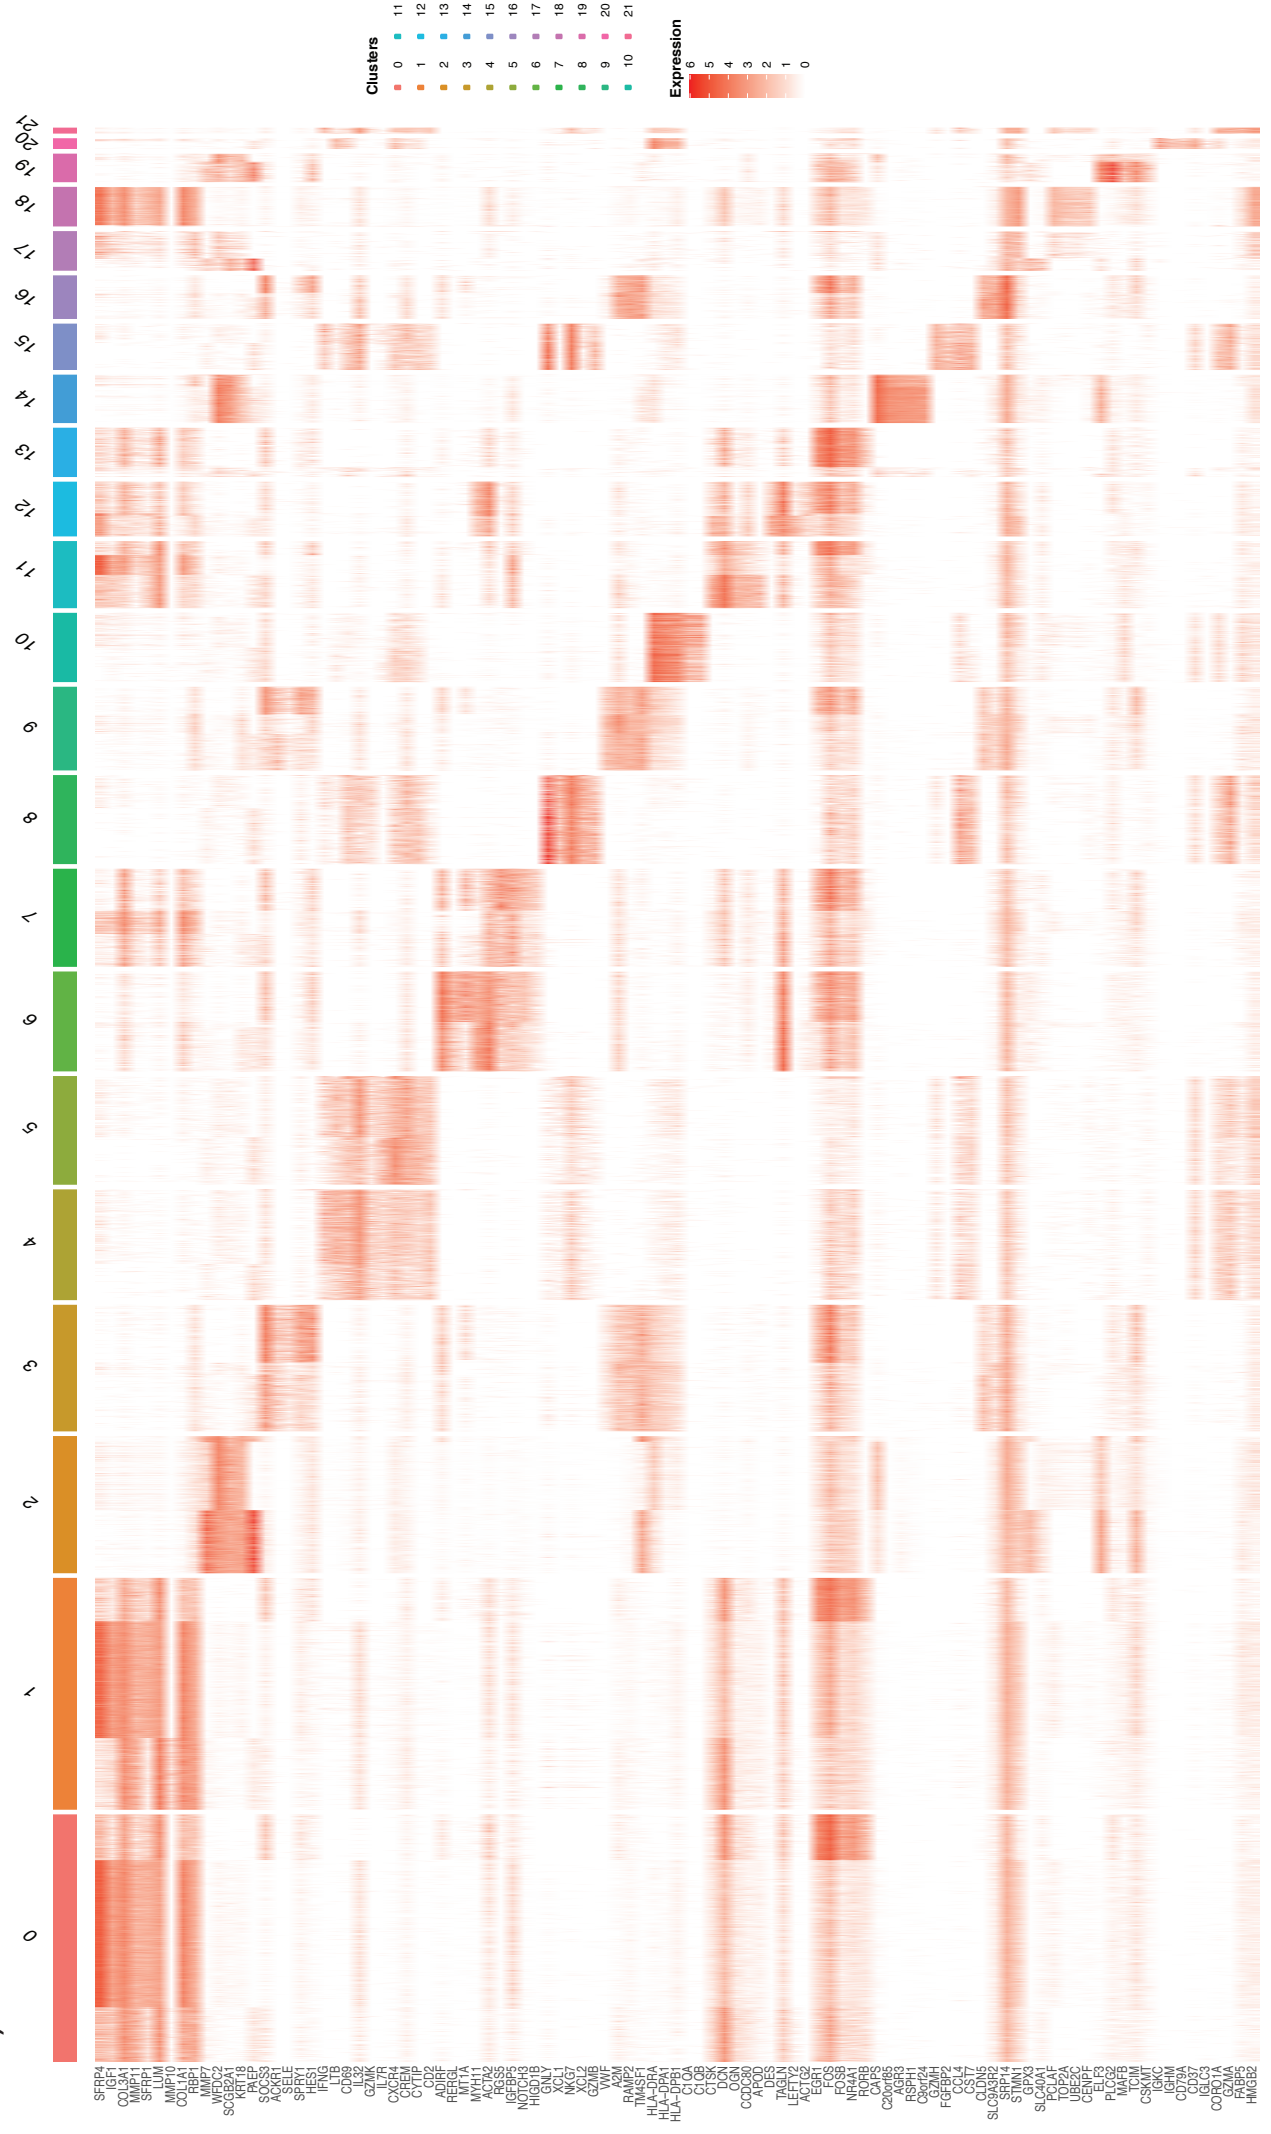

Supplement: NIHMS1884879-supplement-MMC1.pdf [file NIHMS1884879-supplement-MMC1.pdf]

b) DoRothEA Result

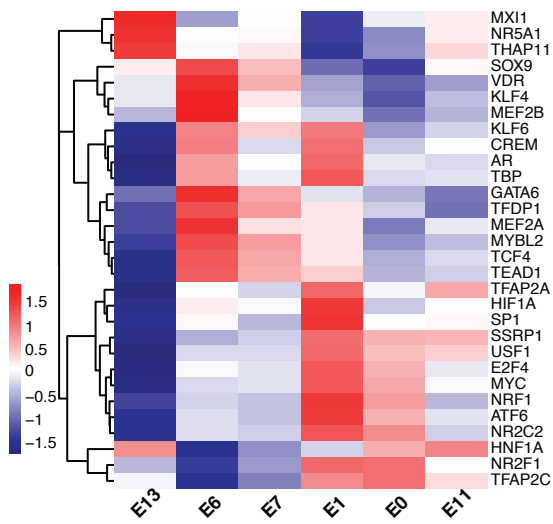

Supplement: NIHMS1884879-supplement-MMC2.pdf [file NIHMS1884879-supplement-MMC2.pdf]

Supplementary figure. 2

a)

Adenomyosis

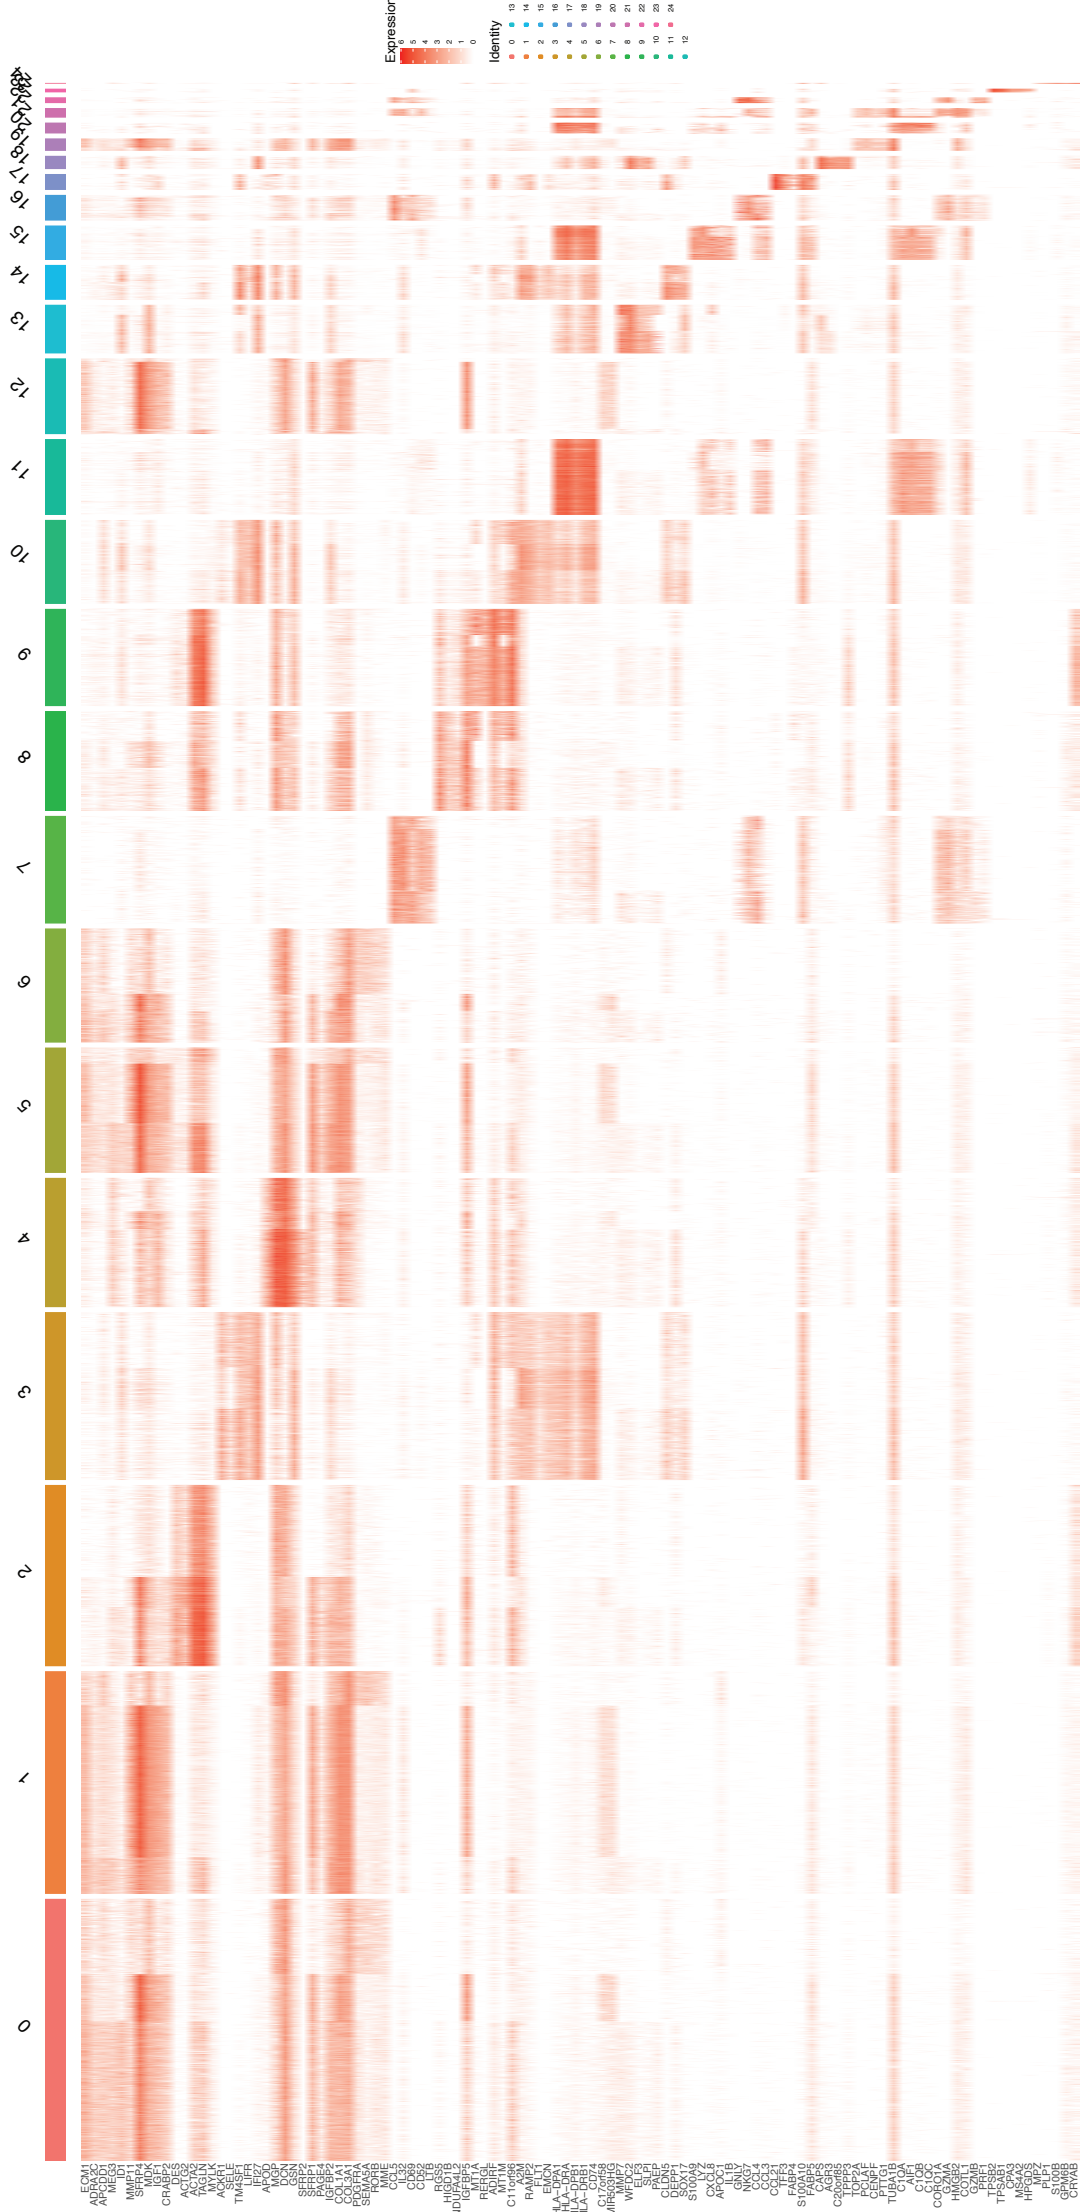

Supplement: NIHMS1884879-supplement-MMC3.pdf [file NIHMS1884879-supplement-MMC3.pdf]

Supplementary figure. 2 continued

b) DoRothEA Result

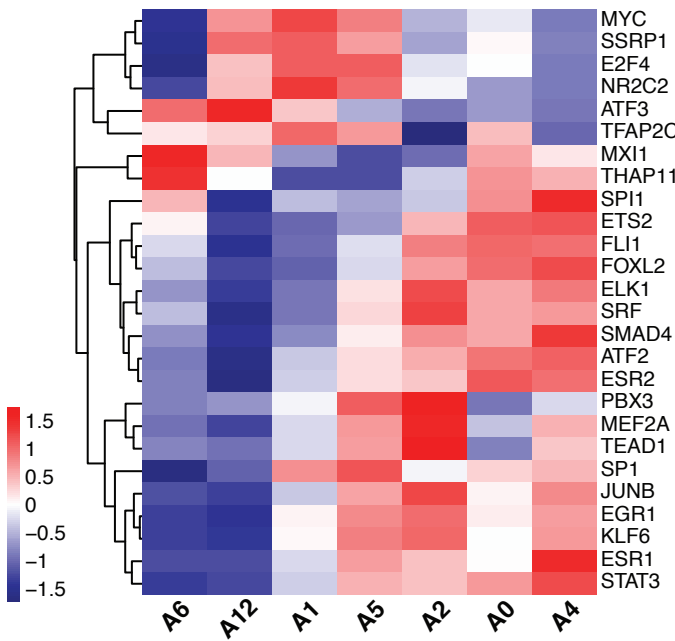

Supplement: NIHMS1884879-supplement-MMC4.pdf [file NIHMS1884879-supplement-MMC4.pdf]

Supplementary figure. 3

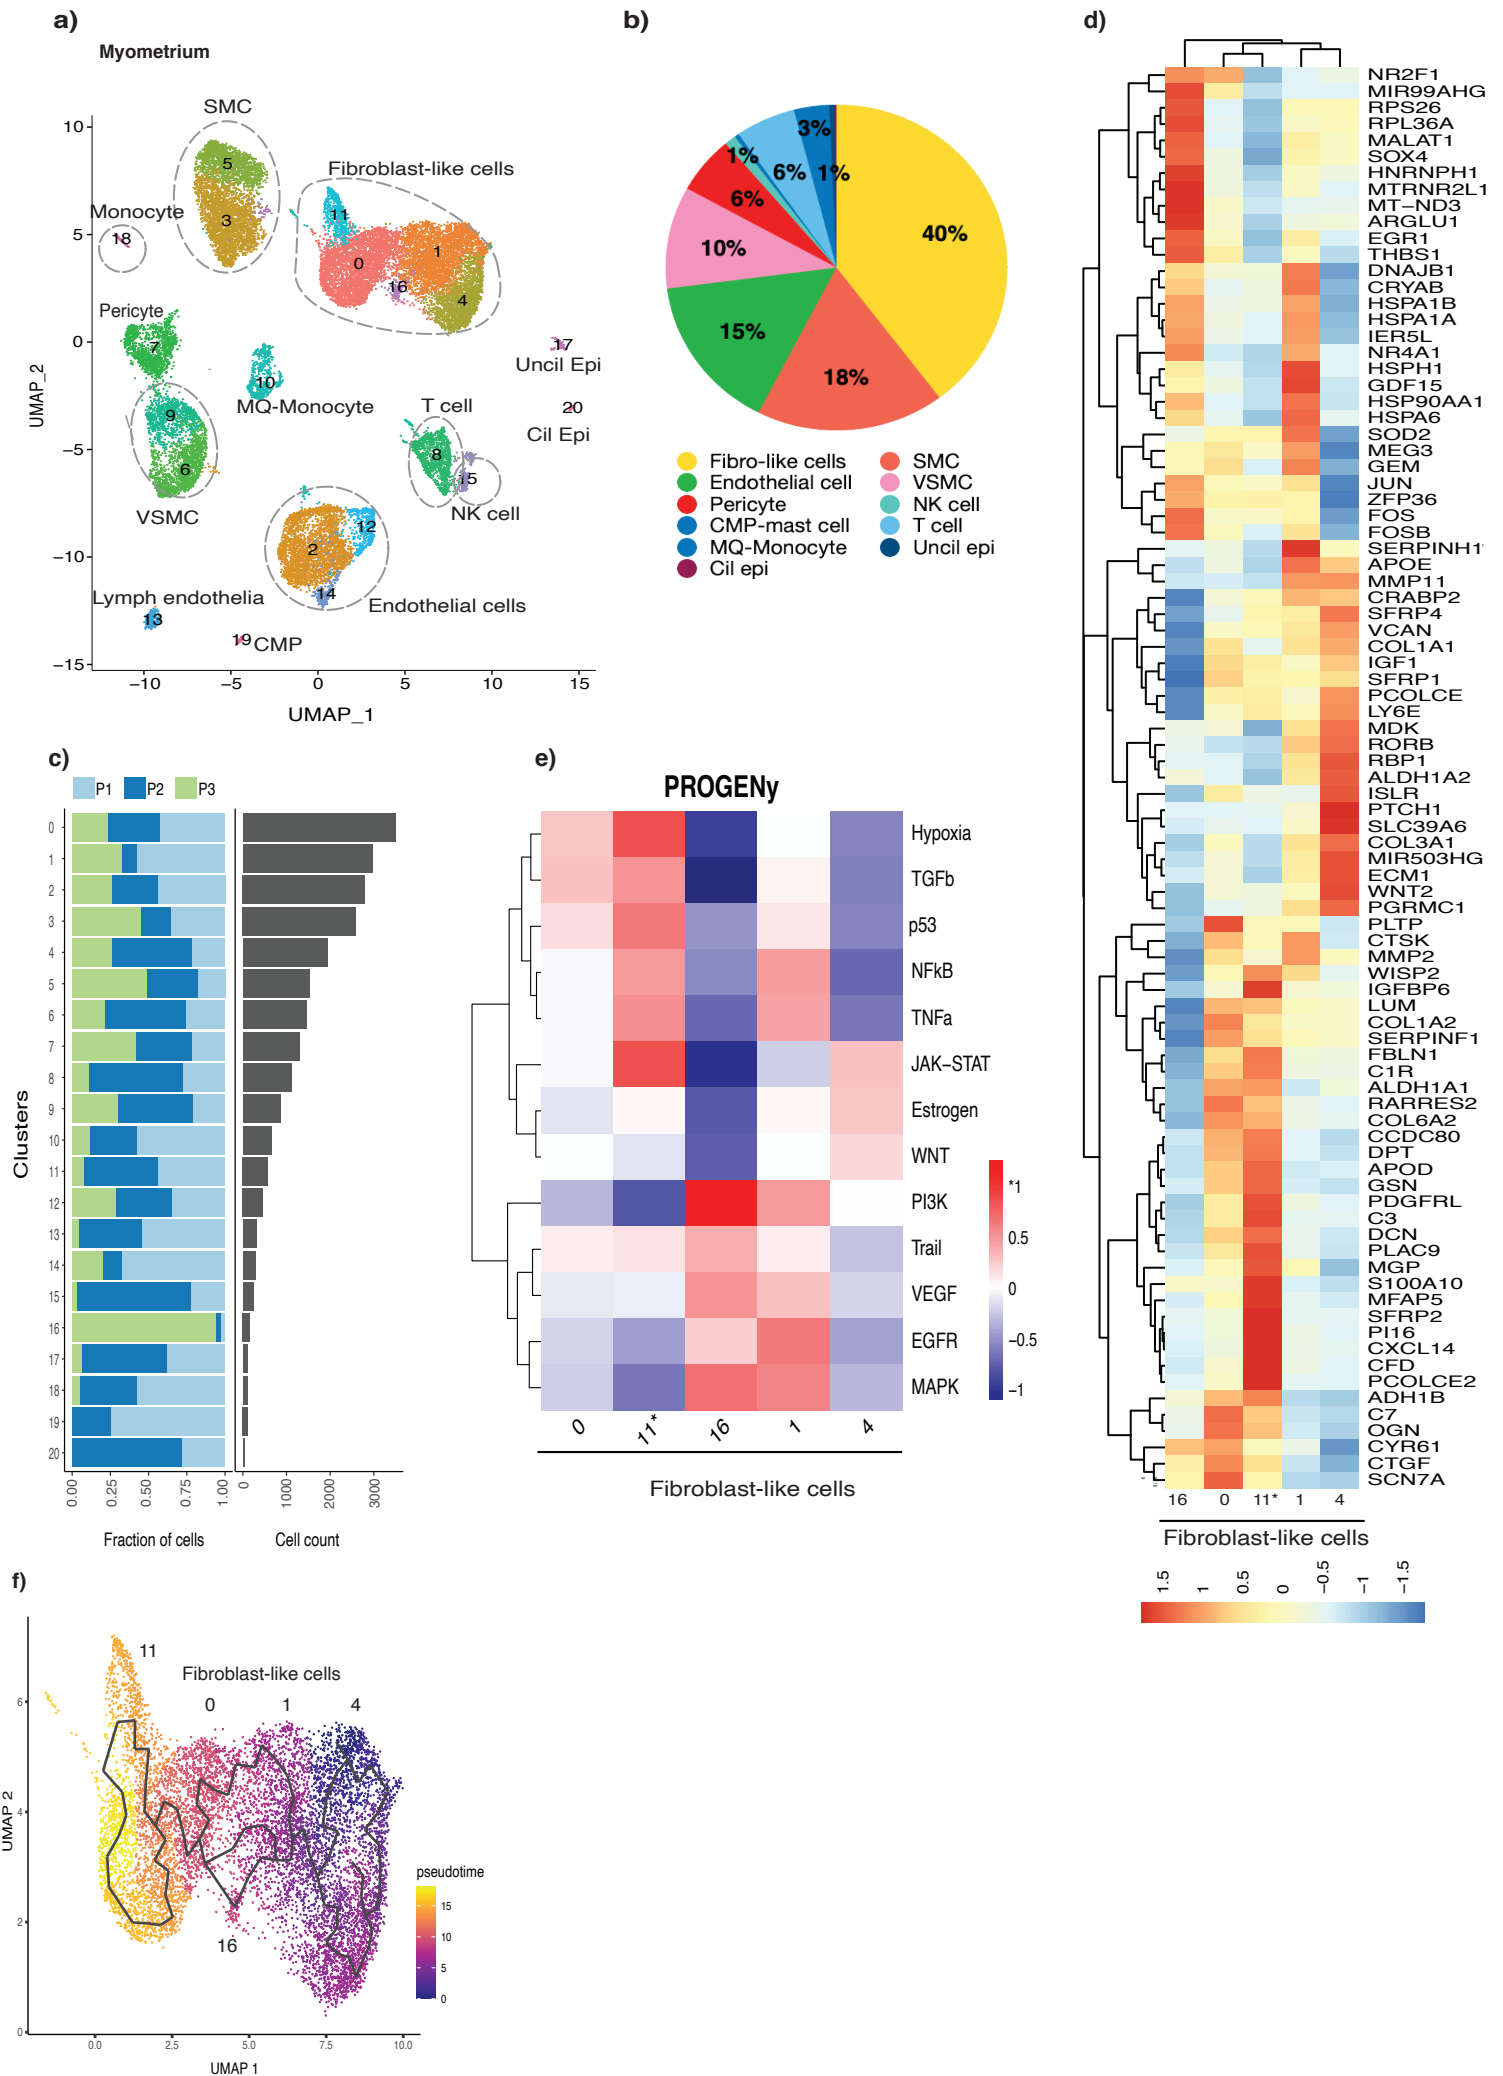

Supplement: NIHMS1884879-supplement-MMC5.pdf [file NIHMS1884879-supplement-MMC5.pdf]

Supplementary figure. 4

a)

Myometrium

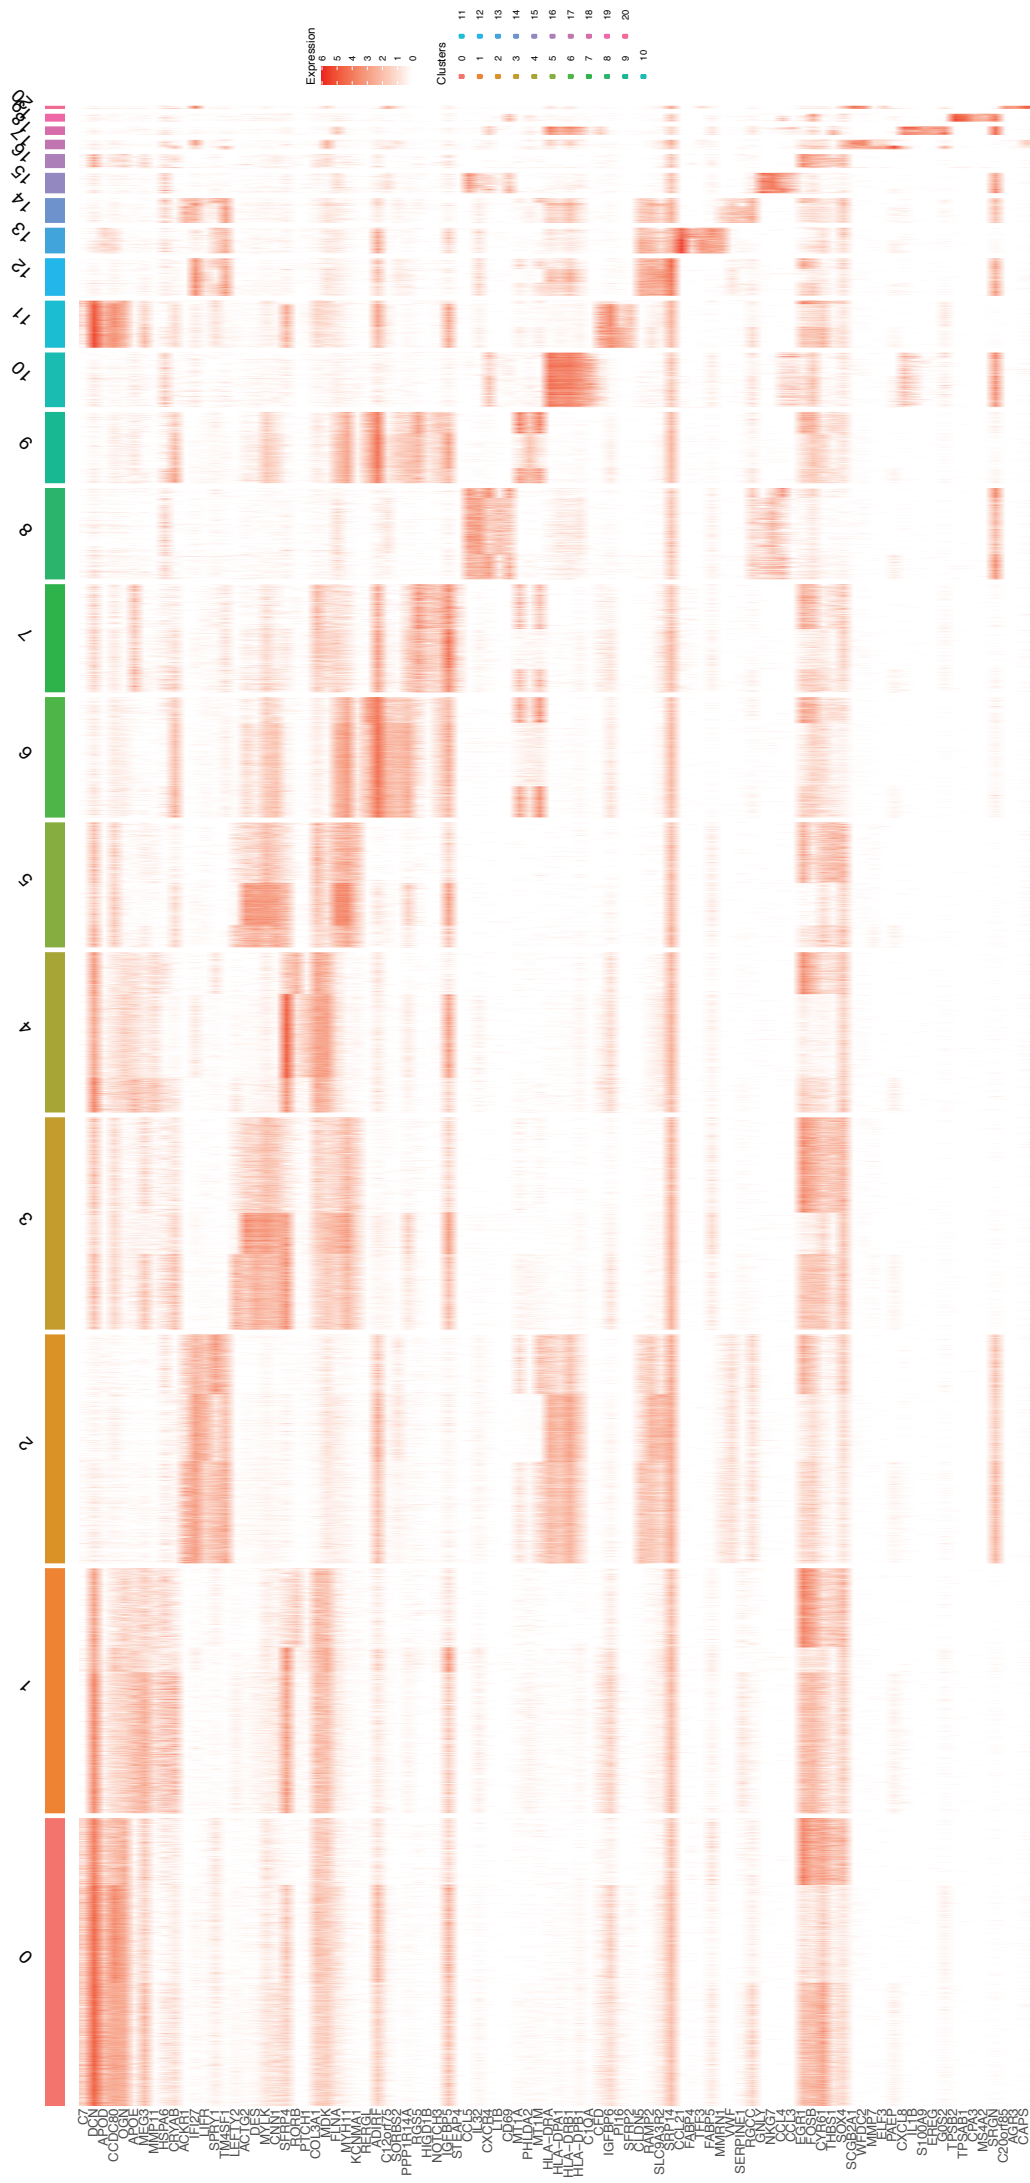

Supplement: NIHMS1884879-supplement-MMC6.pdf [file NIHMS1884879-supplement-MMC6.pdf]

Supplementary figure. 4 continued

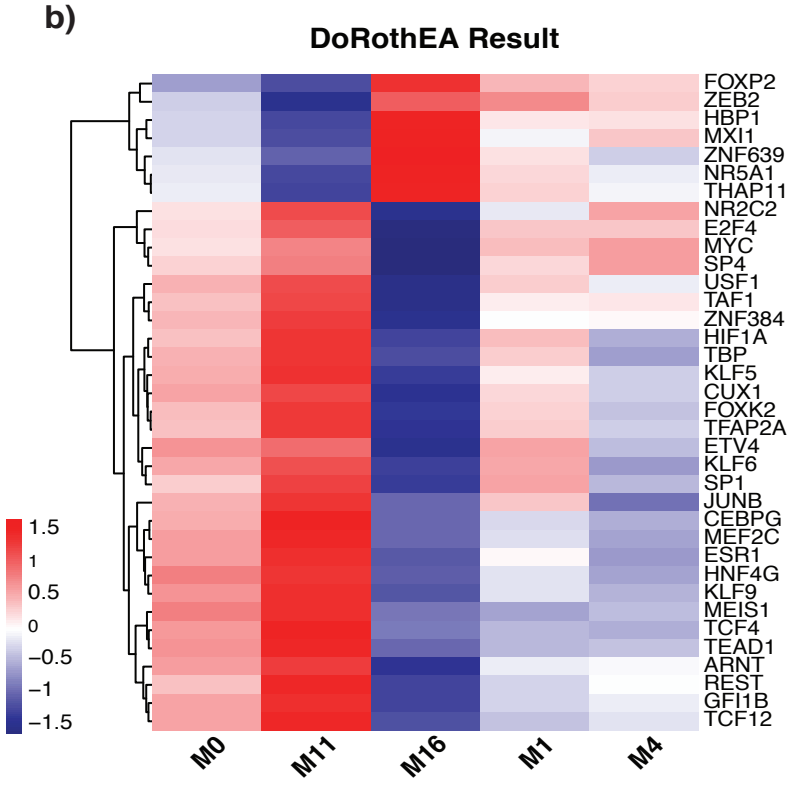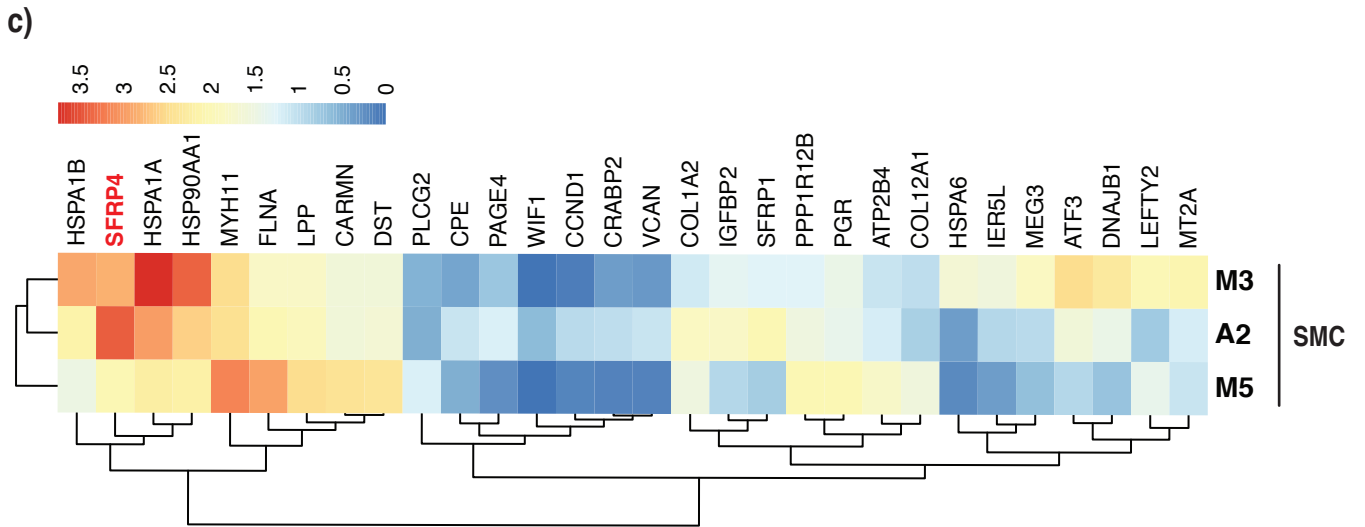

M: Myometrium  
A: Adenomyosis  
C: Cluster

Supplement: NIHMS1884879-supplement-MMC7.pdf [file NIHMS1884879-supplement-MMC7.pdf]

Supplementary figure. 6

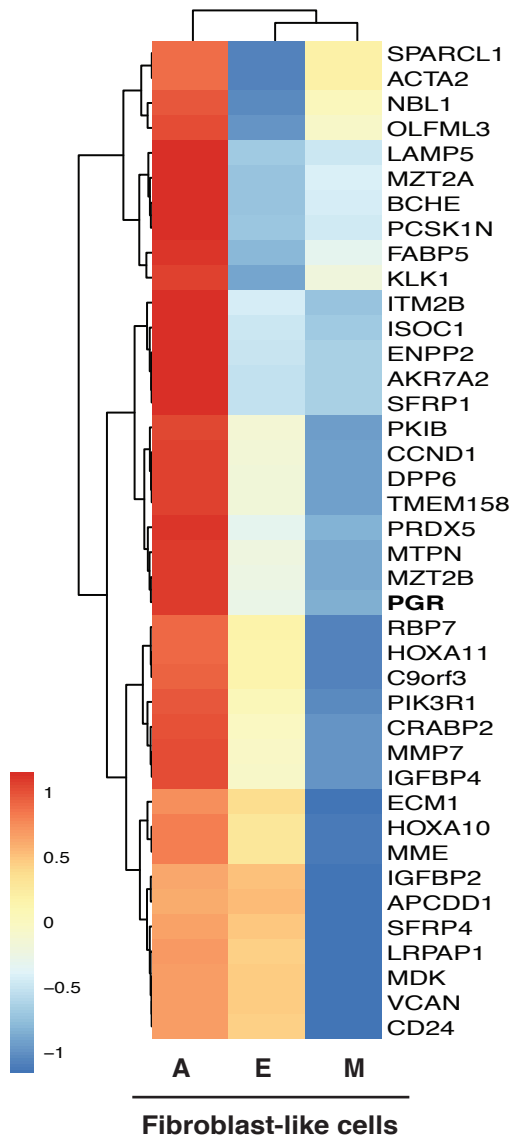

Supplement: NIHMS1884879-supplement-MMC9.pdf [file NIHMS1884879-supplement-MMC9.pdf]
